# Supplementary material for: Reporting of Perinatal Outcomes in Probiotic Randomized Controlled Trials. A Systematic Review and Meta-Analysis
Source: MDPI journal article supplement (doi:10.3390/nu13010256), 2021-01-17

Figure S1. Random effect meta-analysis of studies evaluating the administration of probiotics during early or mid-pregnancy and preterm birth

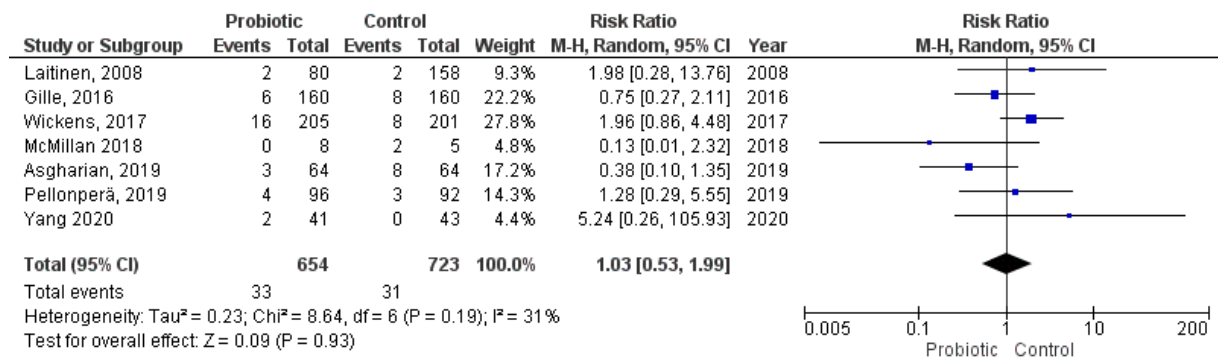

Figure S2. Random effect meta-analysis of studies evaluating the administration of *L.rhamnosus* GR-1 in combination with *L.reuteri* RC-14 and preterm birth

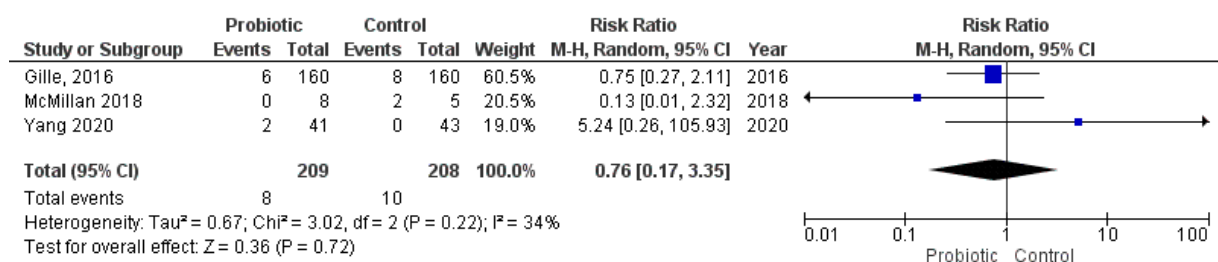

Figure S3. Random effect meta-analysis of studies evaluating the administration of probiotics and weeks of gestation reported as mean  $\pm$  standard deviation.

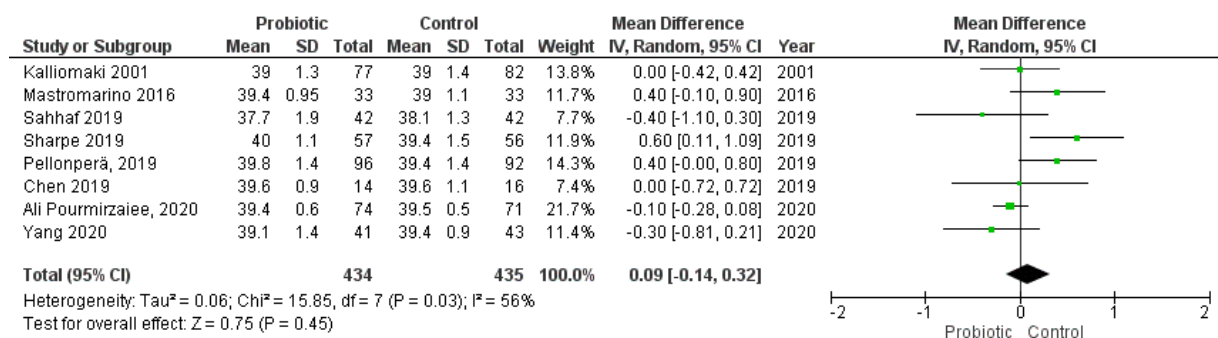

Figure S4. Random effect meta-analysis of studies evaluating the administration of *L.rhamnosus* GG and weeks of gestation

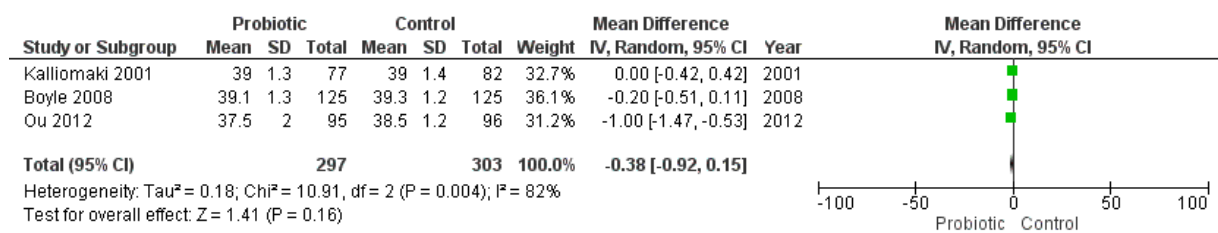

Figure S5. Random effect meta-analysis of studies evaluating the administration of *L.rhamnosus* GR-1 in combination with *L.reuteri* RC-14 and weeks of gestation

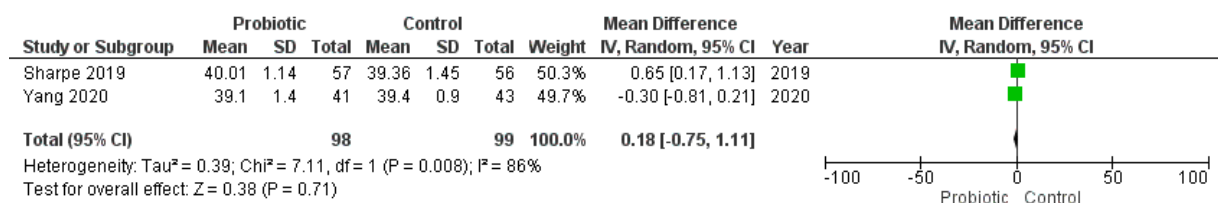

Figure S6. Meta-analysis of studies evaluating the administration of probiotic and birth weight reported as mean  $\pm$  standard deviation.

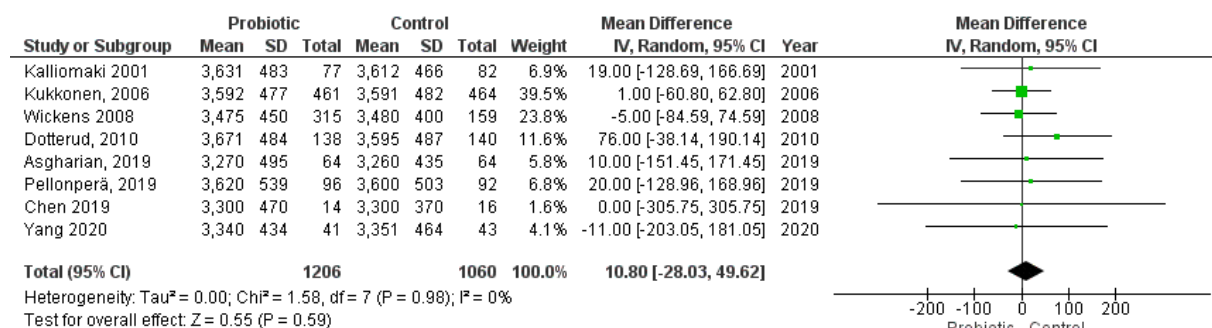

Figure S7. Random effect meta-analysis of studies evaluating the administration of probiotics during early or mid-pregnancy and birth weight

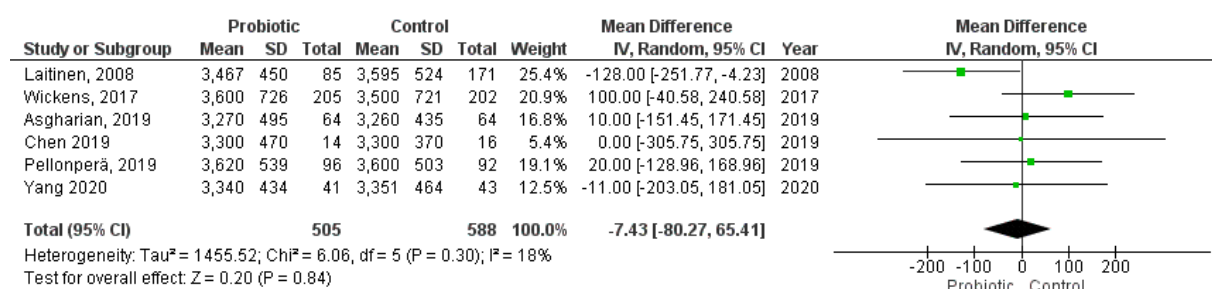

Figure S8. Random effect meta-analysis of studies evaluating the administration of *L.rhamnosus* GG and birth weight

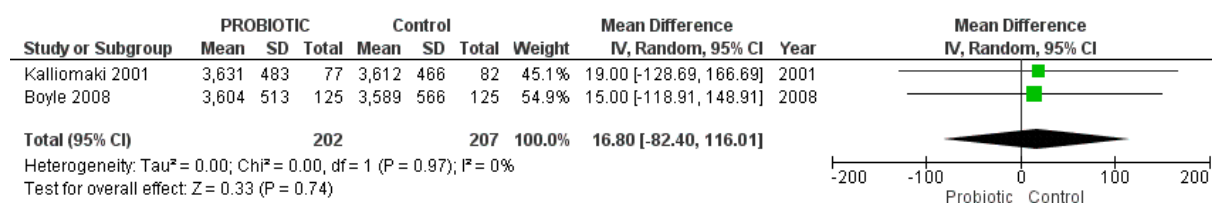

Figure S9. Random effect meta-analysis of studies evaluating the administration of *L.rhamnosus* GG and cesarean section

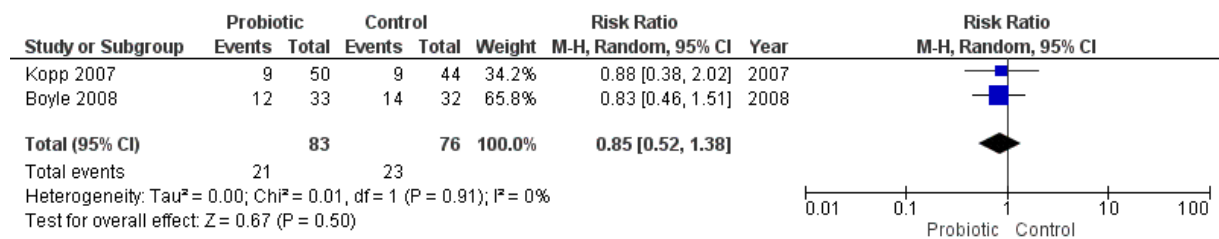

Figure S10. Random effect meta-analysis of studies evaluating the administration of *L.rhamnosus* GR-1 in combination with *L.reuteri* RC-14 and cesarean section

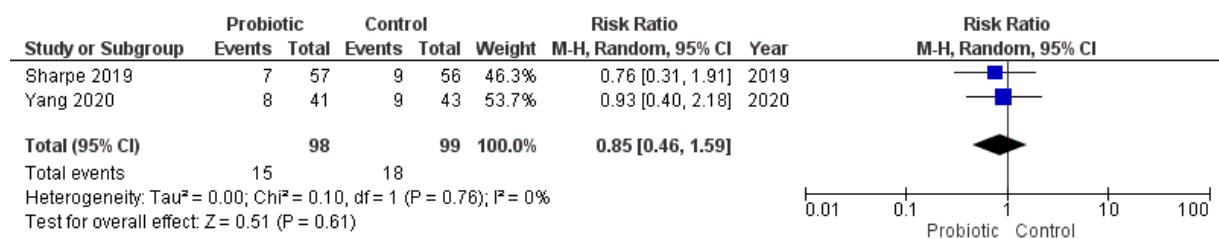

Supplement: s1 [file s1]
