# Supplementary material for: Reporting of Perinatal Outcomes in Probiotic Randomized Controlled Trials. A Systematic Review and Meta-Analysis
Source: MDPI journal article supplement (doi:10.3390/nu13010256), 2021-01-17
Supplement: s1 [file s1]

Table S2. Reporting of perinatal outcomes in individual studies

[illegible]

|                                                                         |                                                       |                                                                                  |                                |                                                                                        |                                |                                |                               |                              |                                |
|-------------------------------------------------------------------------|-------------------------------------------------------|----------------------------------------------------------------------------------|--------------------------------|----------------------------------------------------------------------------------------|--------------------------------|--------------------------------|-------------------------------|------------------------------|--------------------------------|
| Asgharian et al. / Iran / 2019 / IRCT201604013706N31 [34]               | Probiotic = 1<br>Control = 1                          | --                                                                               | Probiotic = 3<br>Control = 8   | Probiotic = 3,270 (495)<br>Control = 3,260 (435)<br>Mean (SD)                          | Probiotic = 13<br>Control = 13 | Probiotic = 3<br>Control = 3   | --                            | --                           | Probiotic = 33<br>Control = 35 |
| Bababi et al. / Iran / 2008 / IRCT20171010036697N1 [35]                 | --                                                    | --                                                                               | --                             | --                                                                                     | --                             | --                             | --                            | --                           | --                             |
| Badehnoosh et al. / Iran / 2017 / IRCT201611115623N91 [36]              | --                                                    | --                                                                               | Probiotic = 2<br>Placebo = 1   | Probiotic = 3,322 (444)<br>Placebo = 3,438 (398)<br>Mean (SD)                          | Probiotic = 9<br>Placebo = 5   | Probiotic = 0<br>Placebo = 3   | --                            | --                           | Probiotic = 6<br>Placebo = 14  |
| Boyle et al. / Australia / 2008 / Cochrane Skin Group Trial No. 36 [37] | Probiotic = 0<br>Placebo = 1<br>(Exclusion criterium) | Probiotic = 39.6 (35.4 – 42.0)<br>Placebo = 39.5 (36.0 – 42.3)<br>Median (Range) | --                             | Probiotic = 3,560 (2,324 – 4,970)<br>Placebo = 3,615 (2,105 – 5,020)<br>Median (Range) | --                             | --                             | --                            | --                           | Probiotic = 14<br>Placebo = 12 |
| Callaway et al. / Australia / 2018 / ACTRN12611001208998 [38]           | Probiotic = 0<br>Placebo = 1                          | Probiotic = 39.32 (1.75)<br>Placebo = 39.14 (1.88)<br>Mean (SD)                  | Probiotic = 17<br>Placebo = 12 | Probiotic = 3,524 (540)<br>Placebo = 3,541 (514)<br>Mean (SD)                          | Probiotic = 7<br>Placebo = 6   | Probiotic = 31<br>Placebo = 30 | Probiotic = 5<br>Placebo = 13 | Probiotic = 7<br>Placebo = 6 | Probiotic = 73<br>Placebo = 80 |
| Chen et al. / China / 2019 / Not reported [14]                          | --                                                    | Probiotic = 39.6 (0.9)<br>Placebo = 39.6 (1.1)<br>Mean (SD)                      | --                             | Probiotic = 3,300 (470)<br>Placebo = 3,300 (370)<br>Mean (SD)                          | --                             | --                             | --                            | --                           | Probiotic = 4<br>Placebo = 1   |

|                                                          |                               |                                                         |                               |                                                               |                              |                              |                              |    |                                                        |
|----------------------------------------------------------|-------------------------------|---------------------------------------------------------|-------------------------------|---------------------------------------------------------------|------------------------------|------------------------------|------------------------------|----|--------------------------------------------------------|
| Dewanto et al. / Indonesia / 2017 / Not reported [39]    | --                            | --                                                      | --                            | --                                                            | --                           | --                           | --                           | -- | Probiotic = 13<br>Placebo = 8<br>(Exclusion criterium) |
| Dolatkhan et al. / Iran / 2015 / IRCT201405181597N3 [40] | --                            | --                                                      | --                            | --                                                            | --                           | --                           | --                           | -- | --                                                     |
| Dotterud et al. / Norway / 2010 / NCT00159523 [41]       | --                            | --                                                      | Probiotic = 14<br>Placebo = 8 | Probiotic = 3,671 (484)<br>Placebo = 3,595 (487)<br>Mean (SD) | --                           | --                           | --                           | -- | --                                                     |
| Fernández et al. / Spain / 2015 / NCT01505361 [42]       | --                            | --                                                      | --                            | --                                                            | --                           | --                           | --                           | -- | --                                                     |
| Gille et al. / Germany / 2016 / ISRCTN40042090 [43]      | Probiotic = 12<br>Placebo = 5 | --                                                      | Probiotic = 6<br>Placebo = 8  | --                                                            | --                           | --                           | --                           | -- | --                                                     |
| Halkjær et al. / Denmark / 2020 / NCT02508844 [44]       | --                            | Probiotic = 274 (19)<br>Placebo = 280 (11)<br>Mean (SD) | Probiotic = 4<br>Placebo = 0  | Probiotic = 3,414 (676)<br>Placebo = 3,640 (454)<br>Mean (SD) | Probiotic = 1<br>Placebo = 4 | Probiotic = 4<br>Placebo = 7 | Probiotic = 1<br>Placebo = 0 | -- | Probiotic = 11<br>Placebo = 5                          |
| Ho et al. / Taiwan / 2015 / NCT01577108 [45]             | --                            | Probiotic = 39 (0.9)<br>Placebo = 39 (1.1)<br>Mean (SD) | --                            | Probiotic = 3,123 (398)<br>Placebo = (358)<br>Mean (SD)       | --                           | --                           | --                           | -- | --                                                     |
| Jafarnejad et al. / Iran / 2016 / Not reported [46]      | --                            | --                                                      | Probiotic = 2<br>Placebo = 1  | --                                                            | --                           | --                           | --                           | -- | --                                                     |

|                                                                    |    |                                                                                                                 | (Exclusion<br>criterium)<br>( $<35$ gw)                            |                                                                                                                  |    |                                                              |    |    |                                                                      |
|--------------------------------------------------------------------|----|-----------------------------------------------------------------------------------------------------------------|--------------------------------------------------------------------|------------------------------------------------------------------------------------------------------------------|----|--------------------------------------------------------------|----|----|----------------------------------------------------------------------|
| Jamilian et al. / Iran /<br>2016 /<br>IRCT201503035623N38<br>[47]  | -- | --                                                                                                              | --                                                                 | --                                                                                                               | -- | --                                                           | -- | -- | --                                                                   |
| Jamilian et al. / Iran /<br>2018 /<br>IRCT201706075623N119<br>[48] | -- | Probiotic =<br>38.9 (2.5)<br>Vitamin D<br>and Probiotic<br>= 39.3 (0.8)<br>Placebo =<br>38.6 (1.1)<br>Mean (SD) | Probiotic =<br>1<br>Vitamin D +<br>Probiotic =<br>0<br>Placebo = 1 | Probiotic =<br>3,171 (622)<br>Vitamin D +<br>Probiotic =<br>3,308 (604)<br>Placebo =<br>3,176 (712)<br>Mean (SD) | -- | Probiotic = 1<br>Vitamin D +<br>Probiotic = 2<br>Placebo = 5 | -- | -- | Probiotic =<br>10<br>Vitamin D +<br>Probiotic =<br>7<br>Placebo = 12 |
| Kalliomaki et al. /<br>Finland / 2001 / Not<br>reported [49]       | -- | Probiotic = 39<br>(1.3)<br>Placebo = 39<br>(1.4)<br>Mean (SD)                                                   | --                                                                 | Probiotic =<br>3,631 (483)<br>Placebo =<br>3,612 (466)<br>Mean (SD)                                              | -- | --                                                           | -- | -- | --                                                                   |
| Karamali et al. / Iran /<br>2016 /<br>IRCT201601035623N63<br>[50]  | -- | --                                                                                                              | --                                                                 | Probiotic =<br>3,253<br>Placebo =<br>3,386<br>(Mean)                                                             | -- | Probiotic = 1<br>Placebo = 3<br>(Macrosomia<br>not defined)  | -- | -- | Probiotic =<br>7<br>Placebo = 11                                     |
| Karamali et al. / Iran /<br>2017 /<br>IRCT201704205623N108<br>[51] | -- | Synbiotic =<br>39 (1.1)<br>Placebo =<br>39.4 (1.5)<br>Mean (SD)                                                 | Synbiotic =<br>1<br>Placebo = 0                                    | Synbiotic =<br>3,373 (412)<br>Placebo =<br>3,182 (460)<br>Mean (SD)                                              | -- | Synbiotic = 0<br>Placebo = 3                                 | -- | -- | Synbiotic =<br>5<br>Placebo = 12                                     |

|                                                                                             |                                                                     |                                                                                                                     |                                                                    |                                                                                                            |    |    |    |    |                                                                       |
|---------------------------------------------------------------------------------------------|---------------------------------------------------------------------|---------------------------------------------------------------------------------------------------------------------|--------------------------------------------------------------------|------------------------------------------------------------------------------------------------------------|----|----|----|----|-----------------------------------------------------------------------|
| Kijmanawat et al. / Thailand / 2018 / Thai Clinical Trials Registry Number 20170606002 [52] | --                                                                  | --                                                                                                                  | --                                                                 | Probiotic = 3,120 (411)<br>Placebo = 3,123 (370)<br>Mean (SD)                                              | -- | -- | -- | -- | --                                                                    |
| Kim et al. / Korea / 2009 / ISRCTN26134979 [53]                                             | --                                                                  | Probiotic = 39.7 (0.25)<br>Placebo = 39,5 (0.2)<br>Mean (Standard error)                                            | --                                                                 | Probiotic = 3,330 (70)<br>Placebo = 3,250 (60)<br>Mean (Standard error)                                    | -- | -- | -- | -- | Probiotic = 5<br>Placebo = 11                                         |
| Kopp et al. / Germany / 2007 / UKF000505 [54]                                               | --                                                                  | Probiotic = 39.8<br>Placebo = 39.7<br>Mean                                                                          | --                                                                 | Probiotic = 3,493<br>Placebo = 3,379<br>Mean                                                               | -- | -- | -- | -- | Probiotic = 9<br>Placebo = 9                                          |
| Kukkonen et al. / Finland / 2006 / Not reported [55]                                        | --                                                                  | --                                                                                                                  | Probiotic = 27<br>Placebo = 18<br>(Exclusion criterium)            | Probiotic = 3,595 (477)<br>Placebo = 3,591 (482)<br>Mean (SD)                                              | -- | -- | -- | -- | Probiotic = 75<br>Placebo = 79                                        |
| Laitinen et al. / Finland / 2008 / NCT00167700 [56,57]                                      | Diet + probiotic = 3<br>Diet + placebo = 2<br>Control + Placebo = 0 | Diet + Probiotics = 40 (36.9 – 42.8)<br>Diet + Placebo = 40 (30.5 – 42.4)<br>Control + Placebo = 40.0 (34.9 – 43.3) | Diet + probiotic = 2/80<br>Diet + placebo = 1/79<br>Placebo = 1/79 | Diet + Probiotics = 3,467 (3,370 – 3,564)<br>Diet + Placebo = 3,579 (3,469 – 3,688)<br>Control + Placebo = | -- | -- | -- | -- | Diet + probiotic = 12/75<br>Diet + placebo = 12/77<br>Placebo = 11/76 |

|                                                                |                                 | Median<br>(Range)                                                                                             |                                                                                  | 3,611 (3,494<br>– 3,727)<br>Mean (SD)                                                                              |                                 |                                   |                                        |    |                                                                                    |
|----------------------------------------------------------------|---------------------------------|---------------------------------------------------------------------------------------------------------------|----------------------------------------------------------------------------------|--------------------------------------------------------------------------------------------------------------------|---------------------------------|-----------------------------------|----------------------------------------|----|------------------------------------------------------------------------------------|
| Lindsay et al. / Ireland /<br>2014 /<br>ISRCTN97241163(A) [58] | Probiotic =<br>0<br>Placebo = 0 | Probiotic =<br>280 (10.2)<br>Placebo = 282<br>(10.3) Mean<br>(SD)                                             | Probiotic =<br>3<br>Placebo = 2                                                  | Probiotic =<br>3,700 (520)<br>Placebo =<br>3,680 (510)<br>Mean (SD)                                                | Probiotic =<br>6<br>Placebo = 7 | Probiotic =<br>15<br>Placebo = 16 | --                                     | -- | Probiotic =<br>20<br>Placebo = 25                                                  |
| Lindsay et al. / Ireland<br>/2015 /<br>ISRCTN97241163(B) [59]  | Probiotic =<br>0<br>Placebo = 2 | Probiotic =<br>278.34 (12.25)<br>Placebo =<br>277.23 (11.20)<br>Mean (SD)                                     | Probiotic =<br>0<br>Placebo = 0                                                  | Probiotic =<br>3,570 (640)<br>Placebo =<br>3,600 (570)<br>Mean (SD)                                                | Probiotic =<br>5<br>Placebo = 5 | Probiotic =<br>19<br>Placebo = 17 | Probiotic =<br>7/56<br>Placebo<br>7/58 | -- | Probiotic =<br>24<br>Placebo = 21                                                  |
| Mantaring et al. /<br>Philippines / 2018 /<br>NCT01073033 [60] | --                              | Supplement<br>= 38.8 (1.5)<br>Supplement<br>+ probiotic =<br>38.8 (2)<br>Control =<br>38.8 (1.2)<br>Mean (SD) | Supplement<br>= 3/70<br>Supplement<br>+ probiotic<br>= 1/70<br>Control =<br>1/68 | Supplement<br>= 2,930 (470)<br>Supplement<br>+ probiotic<br>= 2,900 (390)<br>Control =<br>2,880 (440)<br>Mean (SD) | --                              | --                                | --                                     | -- | Supplement<br>= 15/70<br>Supplement<br>+ probiotic<br>= 11/70<br>Control =<br>9/68 |
| Mastromarino et al. /<br>Italy / 2015 /<br>NCT01367470 [61,62] | --                              | Probiotic =<br>39.4 (0.95)<br>Placebo = 39<br>(1.1)<br>Mean (SD)                                              | --<br>(Exclusion<br>criterium)                                                   | Probiotic =<br>3,350 (4,800)<br>Placebo =<br>3,415 (501)<br>Mean (SD)                                              | --                              | --                                | --                                     | -- | Probiotic =<br>10<br>Placebo = 14                                                  |
| McMillan et al. / Rwanda<br>/ 2018 / NCT02150655<br>[63]       | Probiotic =<br>0<br>Placebo = 1 | --                                                                                                            | Probiotic =<br>0<br>Placebo = 2                                                  | --                                                                                                                 | --                              | --                                | --                                     | -- | --                                                                                 |
| Nabhani et al. / Iran /<br>2018 /                              | --                              | --                                                                                                            | Synbiotic= 1<br>Placebo = 1                                                      | --                                                                                                                 | --                              | --                                | --                                     | -- | --                                                                                 |

| IRCT201511183140N16<br>[64]                                                 |                                                                                           |                                                                                            | (<35 gw)                                                                                   |                                                                                                     |                                                                                               |    |                                                                                           |    |                                                                                              |
|-----------------------------------------------------------------------------|-------------------------------------------------------------------------------------------|--------------------------------------------------------------------------------------------|--------------------------------------------------------------------------------------------|-----------------------------------------------------------------------------------------------------|-----------------------------------------------------------------------------------------------|----|-------------------------------------------------------------------------------------------|----|----------------------------------------------------------------------------------------------|
| Niers et al. /<br>Netherlands/ 2009 /<br>NCT00200954 [65]                   | --                                                                                        | Probiotic =<br>39.7 (39.2 –<br>40.2) Placebo<br>= 39.7 (39.3 –<br>40.1)<br>Mean<br>(95%CI) | Probiotic =<br>1<br>Placebo = 2<br>(Exclusion<br>criterium)                                | Probiotic =<br>3,558 (3,412<br>– 3,705)<br>Placebo =<br>3,658 (3,520<br>– 3,796)<br>Mean<br>(95%CI) | --                                                                                            | -- | --                                                                                        | -- | Probiotic =<br>4<br>Placebo = 6                                                              |
| Okense-Gafa et al. / New<br>Zealand / 2018 /<br>ACTRN12615000400561<br>[66] | Probiotic =<br>2<br>Placebo = 2                                                           | Probiotic =<br>39.3 (1.7)<br>Placebo =<br>38.9 (2.3)<br>Mean (SD)                          | --                                                                                         | Probiotic =<br>3,685 (565)<br>Placebo =<br>3,504 (672)<br>Mean (SD)                                 | --                                                                                            | -- | Probiotic =<br>8<br>Placebo =<br>17                                                       | -- | Probiotic =<br>40/112<br>Placebo =<br>35/114                                                 |
| Olsen et al. / Australia /<br>2017 / Not reported [67]                      | --                                                                                        | --                                                                                         | --                                                                                         | --                                                                                                  | --                                                                                            | -- | --                                                                                        | -- | --                                                                                           |
| Ou et al. / Taiwan / 2012 /<br>IDNCT00325273 [68]                           | --                                                                                        | Probiotic =39<br>(31 – 41)<br>Placebo = 39<br>(35 – 41)<br>Median<br>(Range)               | --                                                                                         | --                                                                                                  | --                                                                                            | -- | --                                                                                        | -- | --                                                                                           |
| Pellonperä et. / Finland /<br>2019 / NCT01922791 [69]                       | Probiotic +<br>Placebo = 1<br>Fish oil +<br>Probiotic =<br>3<br>Fish oil +<br>Placebo = 3 | Probiotic +<br>Placebo =<br>39.8 (1.4)<br>Fish oil +<br>Probiotic =<br>39.4 (2)            | Probiotic +<br>Placebo = 4<br>Fish oil +<br>Probiotic =<br>11<br>Fish oil +<br>Placebo = 4 | Probiotic +<br>Placebo =<br>3,620 (539)<br>Fish oil +<br>Probiotic =<br>3,530 (647)                 | Probiotic +<br>Placebo =<br>13<br>Fish oil +<br>Probiotic =<br>8<br>Fish oil +<br>Placebo = 6 | -- | Probiotic +<br>Placebo = 7<br>Fish oil +<br>Probiotic =<br>8<br>Fish oil +<br>Placebo = 7 | -- | Probiotic +<br>Placebo = 14<br>Fish oil +<br>Probiotic =<br>19<br>Fish oil +<br>Placebo = 16 |

|                                                                         | Placebo +<br>Placebo = 3 | Fish oil +<br>Placebo =<br>39.4 (2)<br>Placebo +<br>Placebo =<br>39.6 (1.4)<br>Mean (SD) | Placebo +<br>Placebo = 3         | Fish oil +<br>Placebo =<br>3.610 (516)<br>Placebo +<br>Placebo =<br>3,600 (503)<br>Mean (SD) | Placebo +<br>Placebo =<br>13 |                                                             | Placebo +<br>Placebo = 9 |    | Placebo +<br>Placebo = 14                                  |
|-------------------------------------------------------------------------|--------------------------|------------------------------------------------------------------------------------------|----------------------------------|----------------------------------------------------------------------------------------------|------------------------------|-------------------------------------------------------------|--------------------------|----|------------------------------------------------------------|
| Sahhaf et al. / Iran / 2019<br>/ IRCT20121224011862N2<br>[70]           | --                       | Probiotic =<br>37.7 (1.9)<br>Placebo =<br>38.1 (1.3)<br>Mean (SD)                        | --                               | --                                                                                           | --                           | Probiotic = 2<br>Placebo = 8<br>(Macrosomia<br>not defined) | --                       | -- | --                                                         |
| Sharpe et al. / Canada /<br>2019 / NCT02528981 [71]                     | --                       | Probiotic =<br>40.0 (1.1)<br>Placebo =<br>39.4 (1.5)<br>Mean (SD)                        | --                               | --                                                                                           | --                           | --                                                          | --                       | -- | Probiotic =<br>7<br>Placebo = 9                            |
| Taghizadeh et al. / Iran /<br>2013 /<br>IRCT201212105623N3<br>[72]      | --                       | --                                                                                       | --                               | --                                                                                           | --                           | --                                                          | --                       | -- | --                                                         |
| Wickens et al. / New<br>Zealand / 2008 /<br>ACTRN12607000518460<br>[73] | --                       | --                                                                                       | --                               | Probiotic 1<br>= 3,480 (400)<br>Probiotic 2<br>= 3,470 (500)<br>Placebo =<br>3,480 (400)     | --                           | --                                                          | --                       | -- | Probiotic 1<br>= 46<br>Probiotic 2<br>= 57<br>Placebo = 50 |
| Wickens et al. / New<br>Zealand / 2017 /<br>ACTRN12612000196842<br>[74] | --                       | Probiotic =<br>39.7 (38.7 –<br>40.7)<br>Placebo =<br>39.6 (38.7 –                        | Probiotic =<br>16<br>Placebo = 8 | Probiotic =<br>3,600 (3,500<br>– 3,700)<br>Placebo =<br>3,500 (3,400                         | --                           | Probiotic =<br>46<br>Placebo = 32                           | --                       | -- | Probiotic =<br>57<br>Placebo = 51                          |



|                                                   |    | 40.4) Median<br>(Interquartile<br>range)                          |                                 | – 3,600)<br>Mean<br>(95%CI)                                         |    |    |    |    |                                 |
|---------------------------------------------------|----|-------------------------------------------------------------------|---------------------------------|---------------------------------------------------------------------|----|----|----|----|---------------------------------|
| Yang et al. / Canada /<br>2020 / NCT01697683 [75] | -- | Probiotic =<br>39.1 (1.4)<br>Placebo =<br>39.4 (0.9)<br>Mean (SD) | Probiotic =<br>2<br>Placebo = 0 | Probiotic =<br>3,340 (434)<br>Placebo =<br>3,351 (464)<br>Mean (SD) | -- | -- | -- | -- | Probiotic =<br>8<br>Placebo = 9 |

\* Perinatal outcomes reported based on ICD-10 code chapter XV (pregnancy, childbirth and puerperium). Probiotic 10 / Placebo 13.
