# Supplementary material for: Reporting of Perinatal Outcomes in Probiotic Randomized Controlled Trials. A Systematic Review and Meta-Analysis
Source: MDPI journal article supplement (doi:10.3390/nu13010256), 2021-01-17
Supplement: s1 [file s1]

Table S1. Risk of Bias Assessment.

| Reference                         | Randomization process | Intended intervention | Missing outcome data | Outcome measurement | Selection of reported results | Overall bias  |
|-----------------------------------|-----------------------|-----------------------|----------------------|---------------------|-------------------------------|---------------|
| Abrahamsson et al. 2007 [29]      | Low                   | Low                   | Low                  | Low                 | Some Concerns                 | Low           |
| Ahmadi et al. 2016 [30]           | Low                   | Low                   | Low                  | Low                 | Low                           | Low           |
| Ali Pourmirzaiee et al. 2020 [31] | Some Concerns         | Low                   | Low                  | Low                 | Low                           | Low           |
| Allen et al. 2009 [32]            | Low                   | Low                   | Some Concerns        | Low                 | High                          | High          |
| Asemi et al. 2011 [33]            | Some Concerns         | High                  | Low                  | Some Concerns       | Some Concerns                 | High          |
| Asgharian et al. 2019 [34]        | Low                   | Low                   | Low                  | Low                 | Low                           | Low           |
| Bababi et al. 2018 [35]           | Low                   | Low                   | Low                  | Low                 | Low                           | Low           |
| Badehnossh et al 2017 [36]        | Low                   | Low                   | Low                  | Low                 | Low                           | Low           |
| Boyle et al. 2010 [36]            | Low                   | Low                   | Low                  | Low                 | Low                           | Low           |
| Callawa7 et al. 2018 [38]         | Low                   | Low                   | Low                  | Low                 | Low                           | Low           |
| Chen et al. 2019 [14]             | Some Concerns         | High                  | Low                  | High                | High                          | High          |
| Dewanto et al. 2017 [39]          | Some Concerns         | Some Concerns         | Some Concerns        | Low                 | High                          | High          |
| Dolatkhan et al. 2015 [40]        | Low                   | Low                   | Low                  | Low                 | High                          | High          |
| Dotterud et al. 2010 [41]         | Some Concerns         | Low                   | Some Concerns        | Low                 | Low                           | Some Concerns |
| Fernández et al. 2015 [42]        | Some Concerns         | Some Concerns         | Low                  | Some Concerns       | Low                           | High          |
| Gille et al. 2016 [43]            | Low                   | Low                   | Low                  | Low                 | Low                           | Low           |
| Halkjær et al. 2020 [44]          | Low                   | Low                   | Low                  | Low                 | Low                           | Low           |
| Ho et al. 2015 [45]               | Some Concerns         | Some Concerns         | Low                  | Some Concerns       | Low                           | High          |
| Jafarnejad et al. 2016 [46]       | Low                   | Low                   | Low                  | Some Concerns       | High                          | High          |

|                               |               |               |               |               |               |               |
|-------------------------------|---------------|---------------|---------------|---------------|---------------|---------------|
| Jamilian et al. 2016 [47]     | Low           | Low           | Low           | Some Concerns | Low           | Some Concerns |
| Jamilian et al. 2018 [48]     | Some Concerns | Low           | Low           | Some Concerns | High          | High          |
| Kalliomäki et al. 2001 [49]   | Low           | Low           | Low           | Low           | Some Concerns | Some Concerns |
| Karamali et al. 2016 [50]     | Low           | Low           | Low           | Some Concerns | Low           | Some Concerns |
| Karamali et al. 2017 [51]     | Some Concerns | Low           | Low           | Some Concerns | Low           | Some Concerns |
| Kijmanawat et al. 2018 [52]   | Low           | Low           | Low           | Low           | Low           | Low           |
| Kim et al. 2009 [53]          | Some Concerns | Low           | Some Concerns | Low           | Low           | Some Concerns |
| Kopp et al. 2007 [54]         | Some Concerns | Low           | Low           | Some Concerns | Low           | Some Concerns |
| Kukkonen et al. 2006 [55]     | Low           | Low           | Low           | Low           | Low           | Low           |
| Laitinen et al. 2008 [56]     | Low           | Low           | Low           | Low           | Low           | Low           |
| Lindsay et al. 2014 [57]      | Low           | Low           | Low           | Low           | Low           | Low           |
| Lindsay et al. 2015 [58]      | Low           | Low           | Low           | Low           | Low           | Low           |
| Mantaring et al. 2018 [59]    | Low           | Some Concerns | Low           | Some Concerns | Low           | Some Concerns |
| Mastromarino et al. 2015 [61] | High          | Low           | High          | Low           | Low           | High          |
| McMillan et al. 2018 [63]     | High          | Low           | High          | Low           | Low           | High          |
| Nabhani et al. 2018 [64]      | Some Concerns | Low           | Low           | Some Concerns | Low           | Some Concerns |
| Niers et al. 2009 [65]        | Some Concerns | Low           | Some Concerns | Low           | Low           | Some Concerns |
| Okense-Gafa et al. 2018 [66]  | Low           | Low           | Low           | Low           | Low           | Low           |
| Olsen et al. 2017 [67]        | High          | High          | Low           | Some Concerns | High          | High          |
| Ou et al. 2012 [68]           | Low           | Low           | Some Concerns | Some Concerns | Low           | Some Concerns |
| Pellonperä et al. 2019 [69]   | Low           | Low           | Low           | Low           | Low           | Low           |
| Sahhaf et al. 2019 [70]       | Low           | Low           | Low           | Some Concerns | Low           | Some Concerns |
| Sharpe et al. 2019 [71]       | Low           | Low           | Low           | Some Concerns | Some Concerns | Some Concerns |
| Taghizadeh et al. 2013 [72]   | Low           | Low           | Low           | Low           | Some Concerns | Some Concerns |

|                             |               |     |                  |                  |                  |                  |
|-----------------------------|---------------|-----|------------------|------------------|------------------|------------------|
| Wickens et al.<br>2008 [73] | Low           | Low | Low              | Low              | Low              | Low              |
| Wickens et al.<br>2017 [74] | Low           | Low | Low              | Low              | Some<br>Concerns | Some<br>Concerns |
| Yang et al.<br>2020 [75]    | Some Concerns | Low | Some<br>Concerns | Some<br>Concerns | Low              | High             |
