# Supplementary material for: Reporting of Perinatal Outcomes in Probiotic Randomized Controlled Trials. A Systematic Review and Meta-Analysis
Source: MDPI journal article supplement (doi:10.3390/nu13010256), 2021-01-17
Supplement: s1 [file s1]

## Supplementary 1. Search strategy

### PUBMED

- 1 - ("probiotic s"[All Fields] OR "probiotical"[All Fields] OR "probiotics"[MeSH Terms] OR "probiotics"[All Fields] OR "probiotic"[All Fields] OR ("probiotic s"[All Fields] OR "probiotical"[All Fields] OR "probiotics"[MeSH Terms] OR "probiotics"[All Fields] OR "probiotic"[All Fields])) AND ("pregnancy"[MeSH Terms] OR "pregnancy"[All Fields] OR "pregnancies"[All Fields] OR "pregnancy s"[All Fields]) (753 results)
- 2 - ("lactobacillus"[MeSH Terms] OR "lactobacillus"[All Fields]) AND ("pregnancy"[MeSH Terms] OR "pregnancy"[All Fields] OR "pregnancies"[All Fields] OR "pregnancy s"[All Fields]) (899 results)
- 3 - ("gestate"[All Fields] OR "gestated"[All Fields] OR "gestates"[All Fields] OR "gestating"[All Fields] OR "gestational"[All Fields] OR "gestations"[All Fields] OR "pregnancy"[MeSH Terms] OR "pregnancy"[All Fields] OR "gestation"[All Fields]) AND ("probiotic s"[All Fields] OR "probiotical"[All Fields] OR "probiotics"[MeSH Terms] OR "probiotics"[All Fields] OR "probiotic"[All Fields]) (955 results)
- 4 - ("gestate"[All Fields] OR "gestated"[All Fields] OR "gestates"[All Fields] OR "gestating"[All Fields] OR "gestational"[All Fields] OR "gestations"[All Fields] OR "pregnancy"[MeSH Terms] OR "pregnancy"[All Fields] OR "gestation"[All Fields]) AND ("lactobacillus"[MeSH Terms] OR "lactobacillus"[All Fields]) (1,001 results)
- 5 - ("gravity"[MeSH Terms] OR "gravity"[All Fields] OR "pregnant"[All Fields] OR "pregnants"[All Fields]) AND ("probiotic s"[All Fields] OR "probiotical"[All Fields] OR "probiotics"[MeSH Terms] OR "probiotics"[All Fields] OR "probiotic"[All Fields]) (283 results)

6 - ("randomized controlled trial"[Publication Type] OR "randomized controlled trials as topic"[MeSH Terms] OR "randomized clinical trial"[All Fields] OR "randomised clinical trial"[All Fields]) AND ("probiotic s"[All Fields] OR "probiotical"[All Fields] OR "probiotics"[MeSH Terms] OR "probiotics"[All Fields] OR "probiotic"[All Fields]) (3,119 results)

7 - "RCT"[All Fields] AND ("probiotic s"[All Fields] OR "probiotical"[All Fields] OR "probiotics"[MeSH Terms] OR "probiotics"[All Fields] OR "probiotic"[All Fields]) (152 results)

## **SCOPUS**

1 - ( TITLE-ABS-KEY ( "Probiotics" ) AND TITLE-ABS-KEY ( "pregnancy" ) ) (1,234 results)

2 - ( TITLE-ABS-KEY ( "bifidobacterium" ) AND TITLE-ABS-KEY ( "pregnancy" ) ) (470 results)

3 - ( TITLE-ABS-KEY ( "lactobacillus" ) AND TITLE-ABS-KEY ( "pregnancy" ) ) (1,457 results)

4 - ( TITLE-ABS-KEY ( "probiotics" ) AND TITLE-ABS-KEY ( "pregnant" ) ) (467 results)

5 - ( TITLE-ABS-KEY ( "synbiotic" ) AND TITLE-ABS-KEY ( "pregnancy" ) ) (91 results)

## **COCHRANE LIBRARY (CENTRAL) (Trials)**

1 - MeSH descriptor: [Probiotics] explode all trees (1973 results)

2 - MeSH descriptor: [Pregnancy] explode all trees (21,062 results)

3 - MeSH descriptor: [lactobacillus] explode all trees (1,579 results)

4 - MeSH descriptor: [bifidobacterium] explode all trees (713 results)

5 - MeSH descriptor: [Synbiotics] explode all trees (724 results)
