# Supplementary material for: Reporting of Perinatal Outcomes in Probiotic Randomized Controlled Trials. A Systematic Review and Meta-Analysis
Source: Nutrients. 2021 Jan 17;13(1):256. doi: 10.3390/nu13010256 (PMC7830438; doi:10.3390/nu13010256)
Supplement: Supplementary file 1 [file nutrients-13-00256-s001.zip]

Archive with 5 entries (5 files):
- Supplementary 1.pdf
- Supplementary 2.pdf
- Supplementary 3.pdf
- Supplementary 4.pdf
- Supplementary 5.pdf
